# Supplementary material
Source: bioRxiv or medRxiv preprint supplement (https://www.biorxiv.org/highwire/filestream/44344/field_highwire_adjunct_files/0/149229-1.pdf)
Supplement: Supplementary file [file 149229-1.pdf]

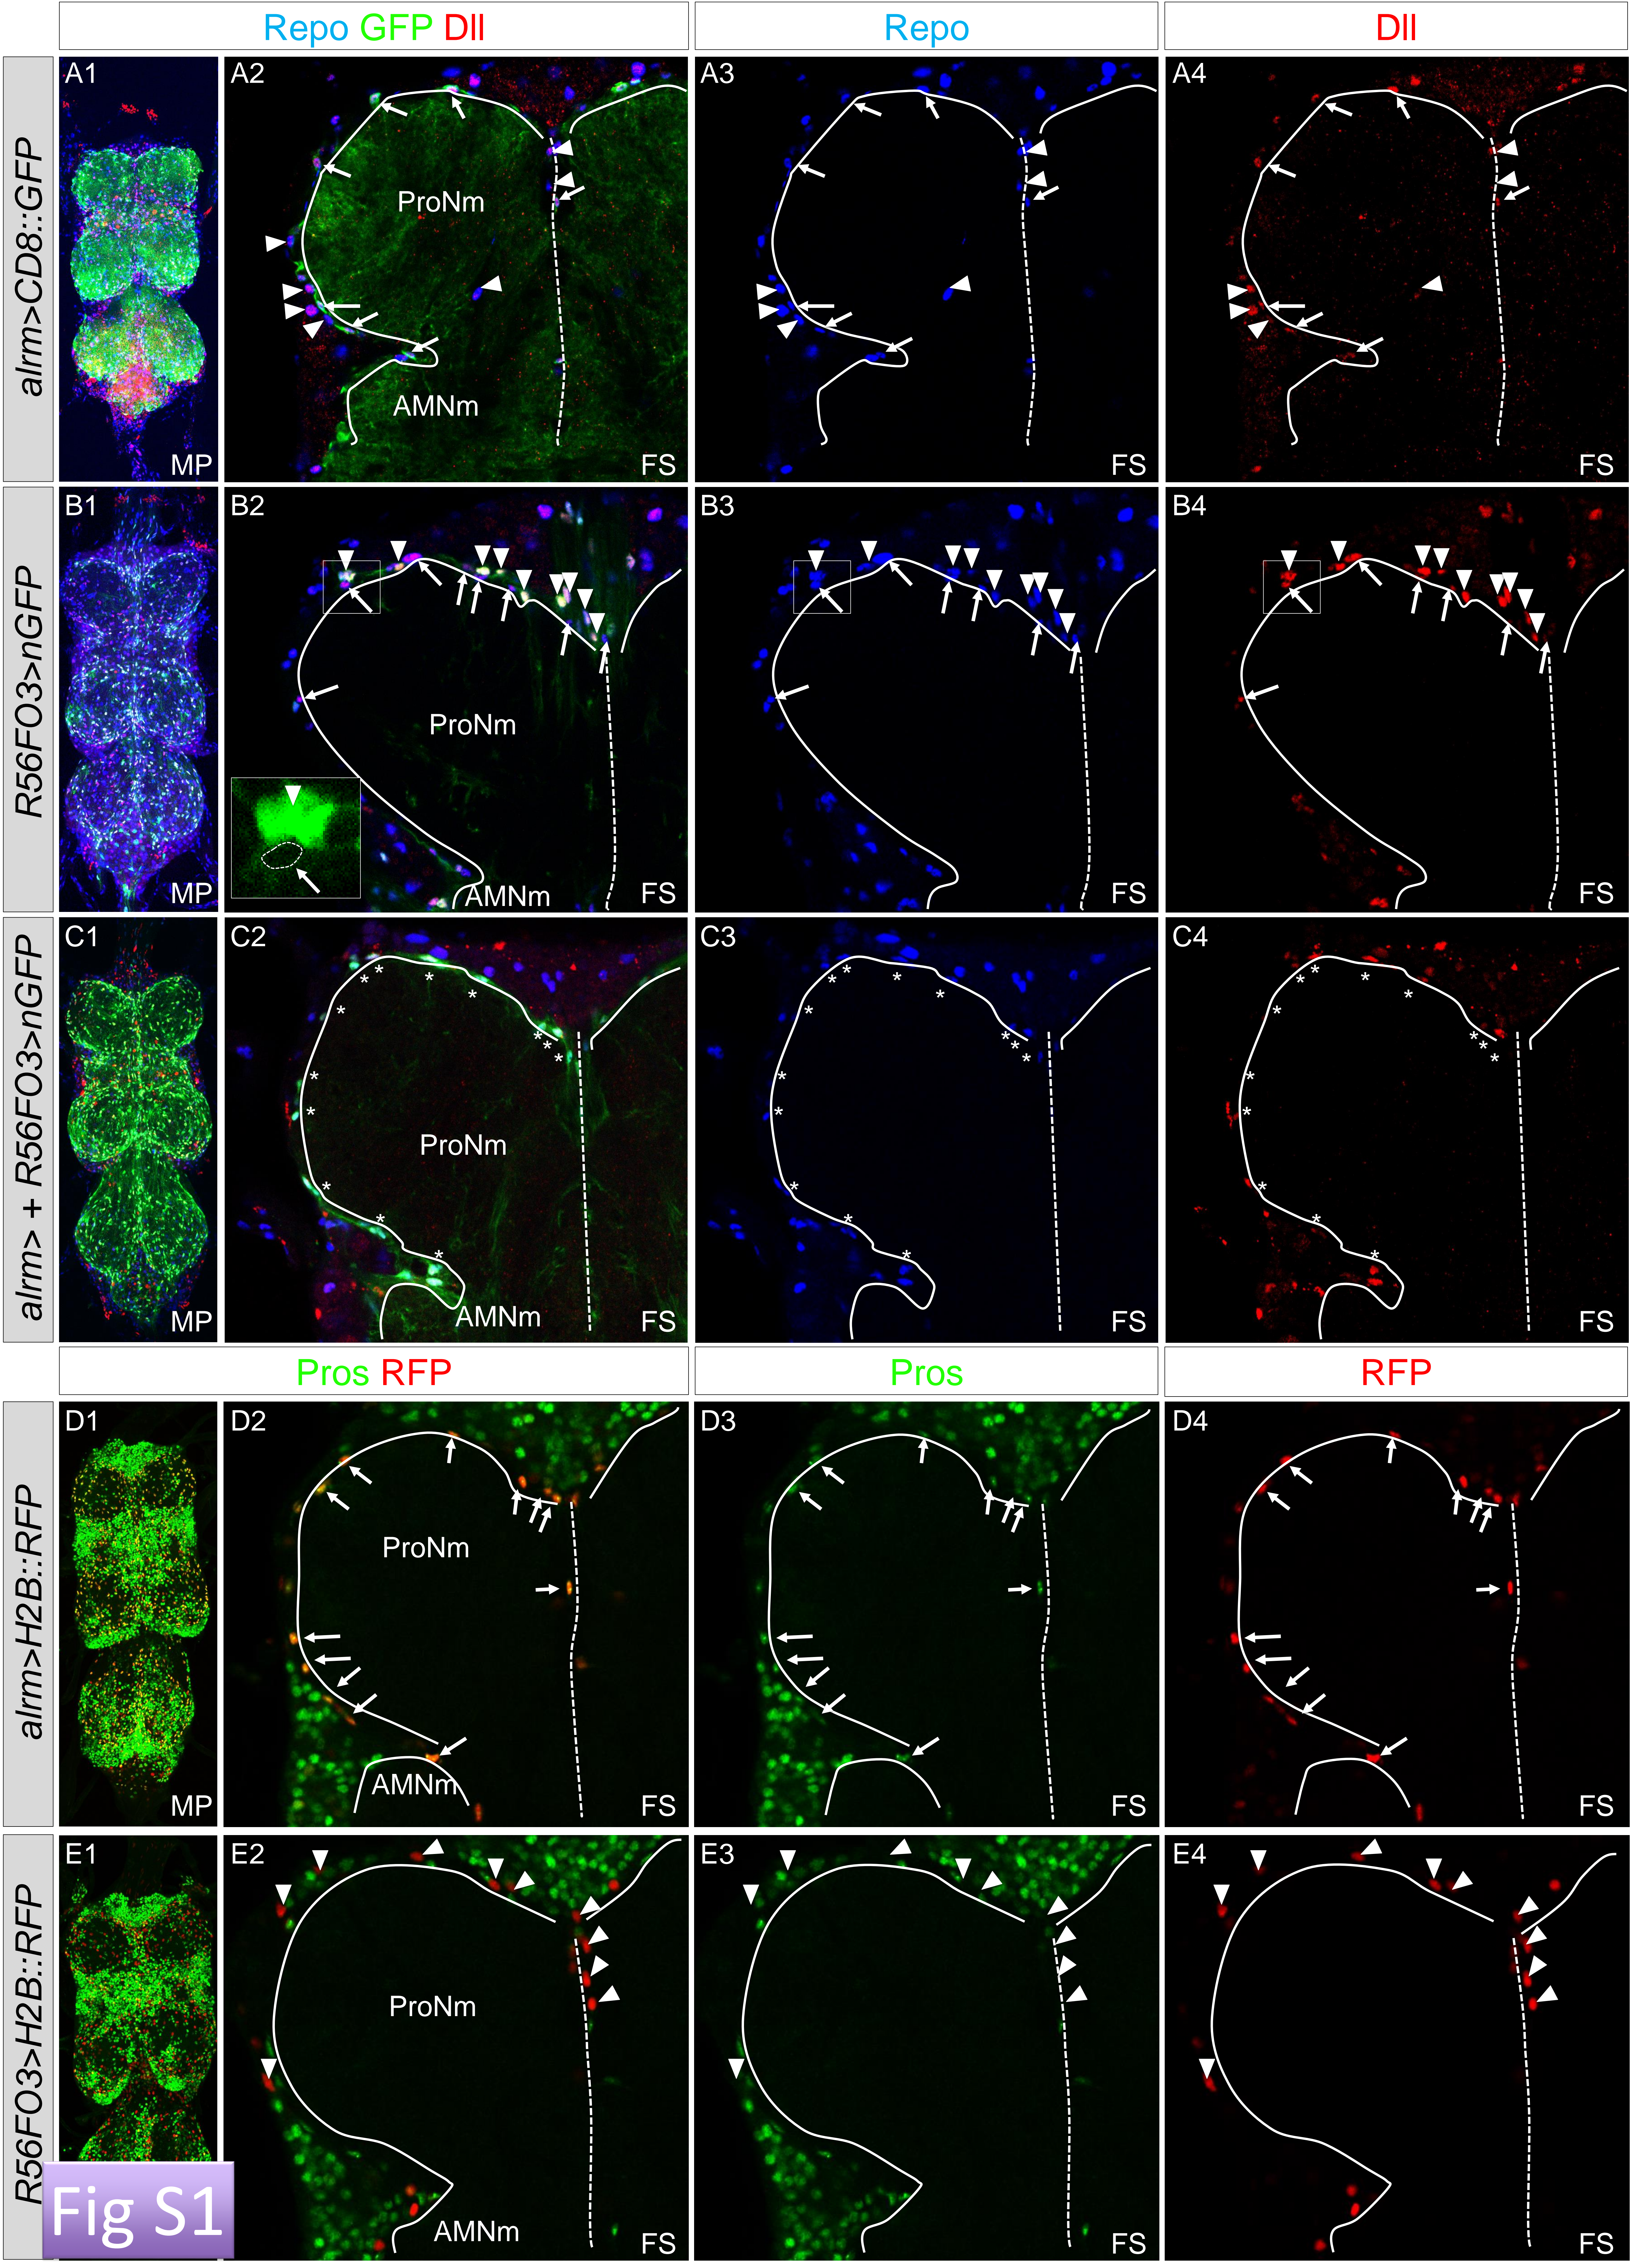

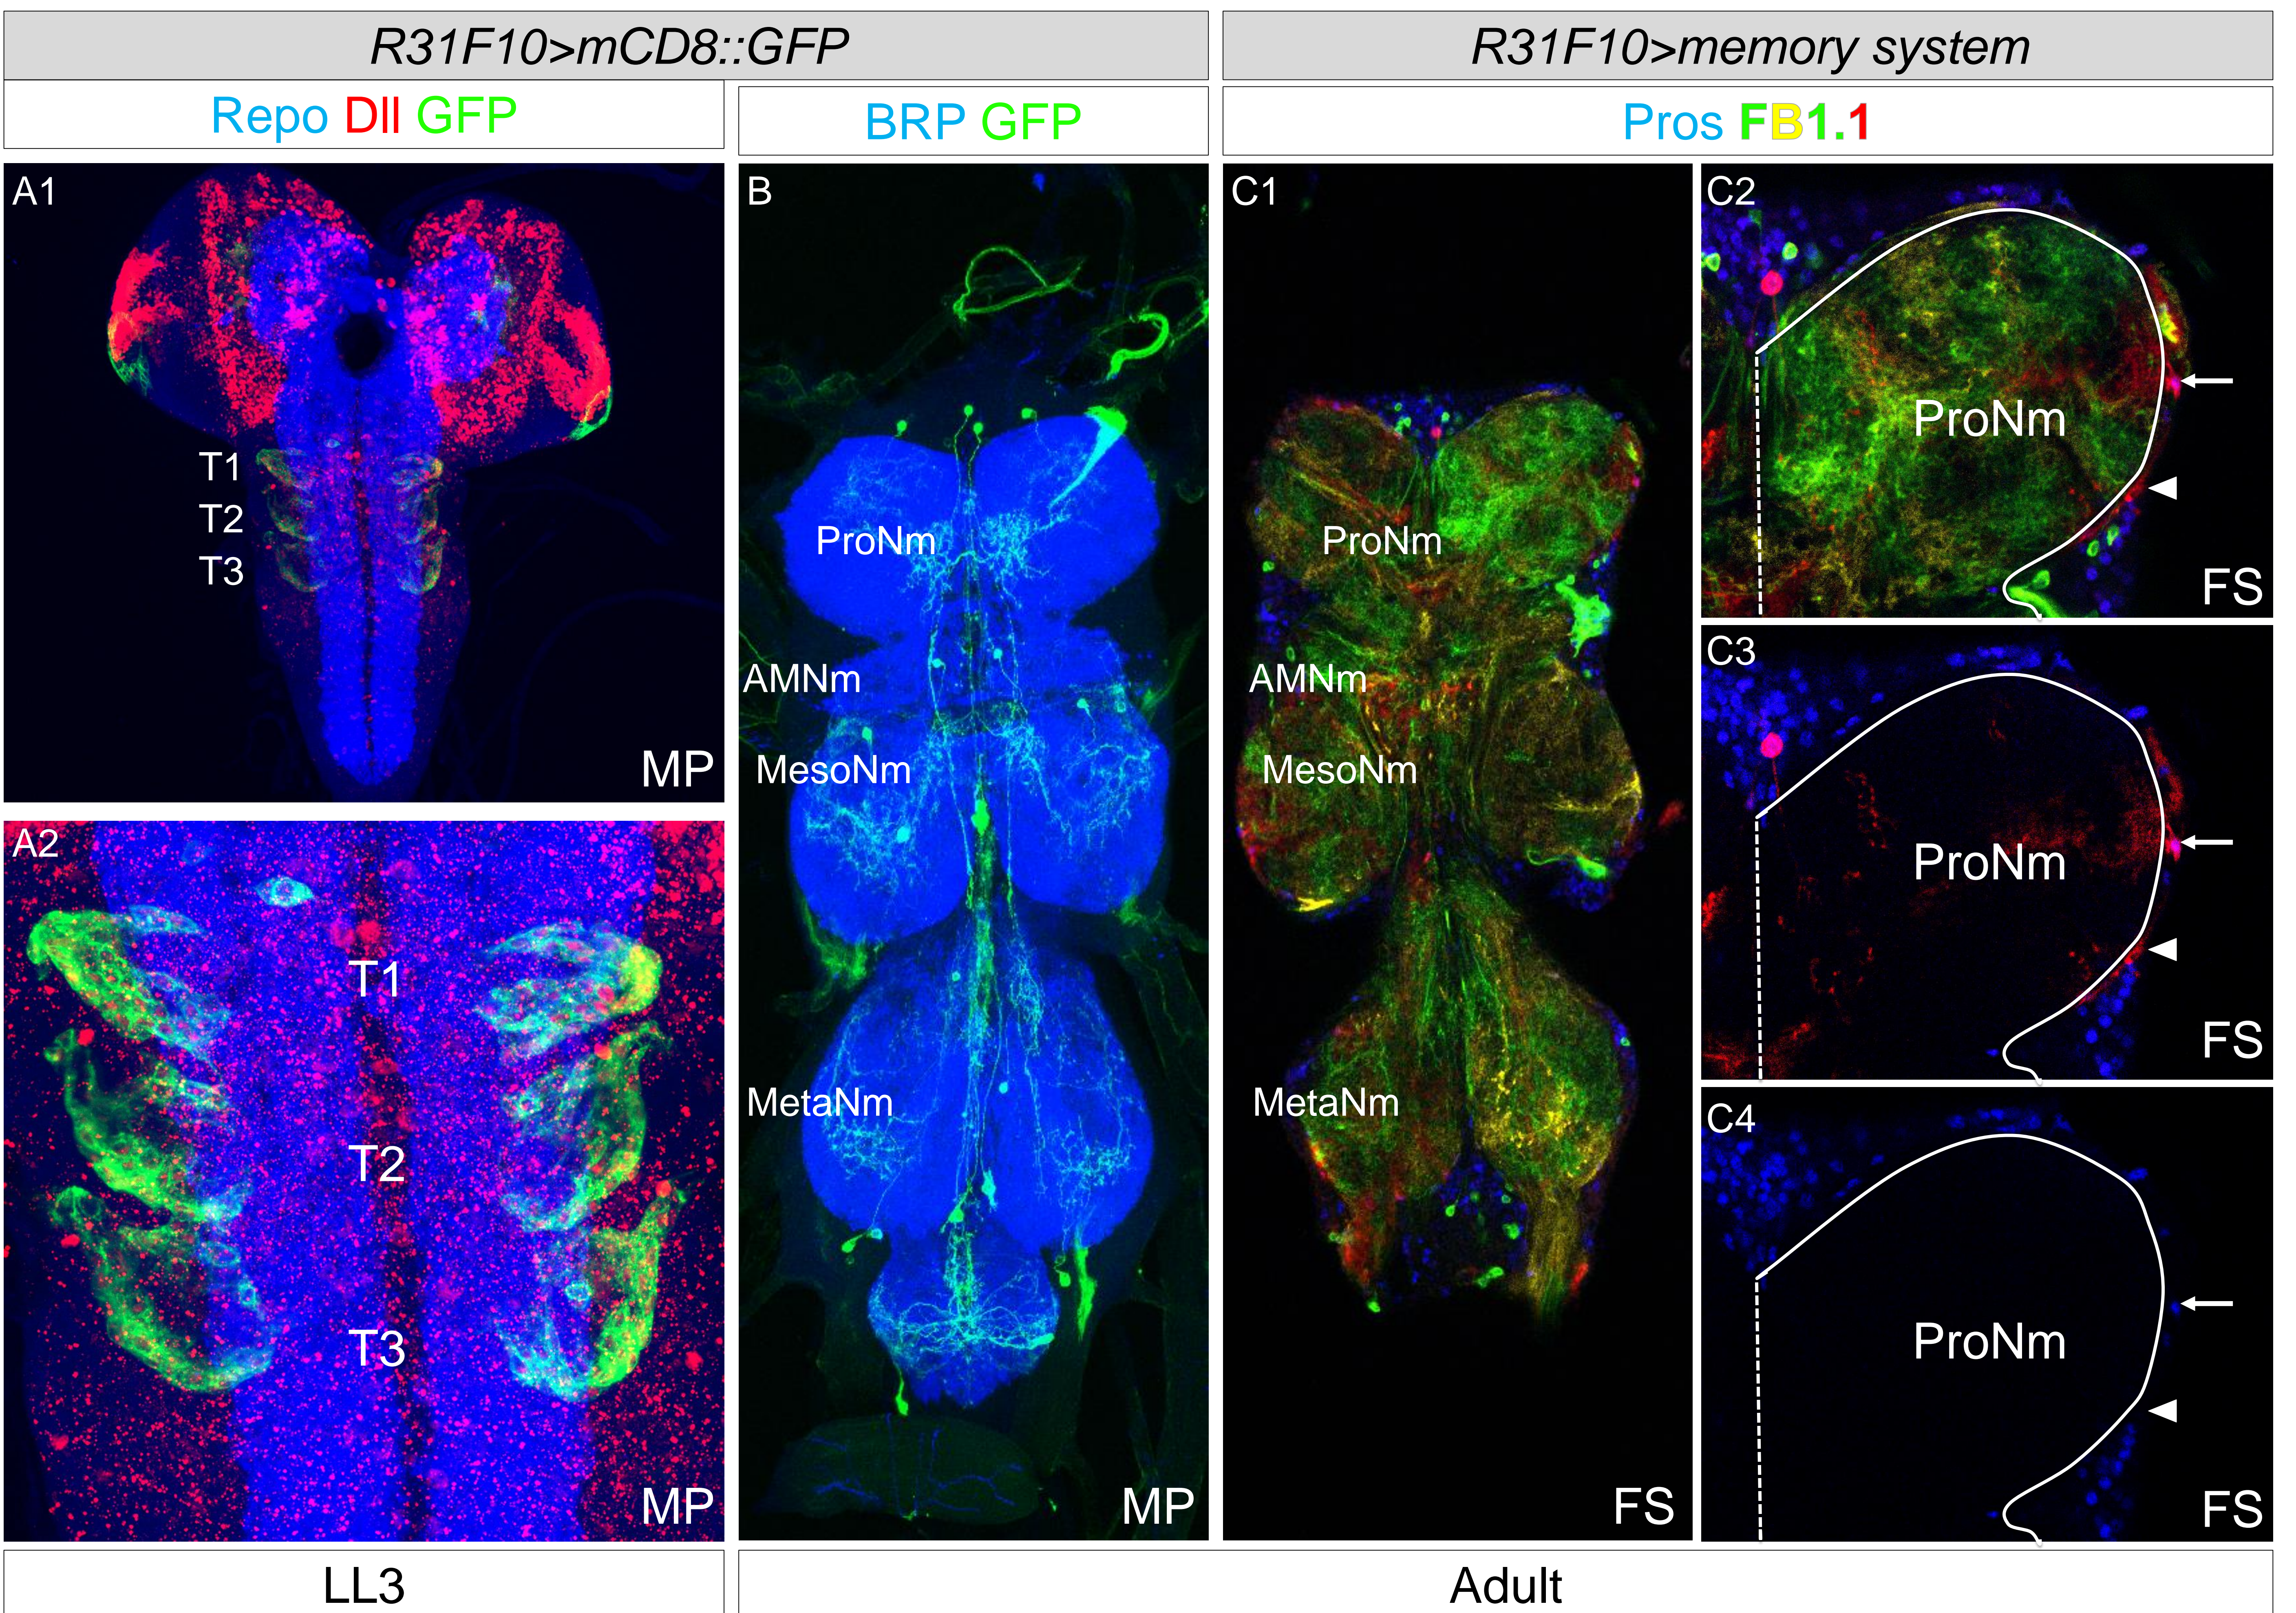

Fig S2

*Dll>CD8::GFP*, 5h APF: BRP NCad GFP

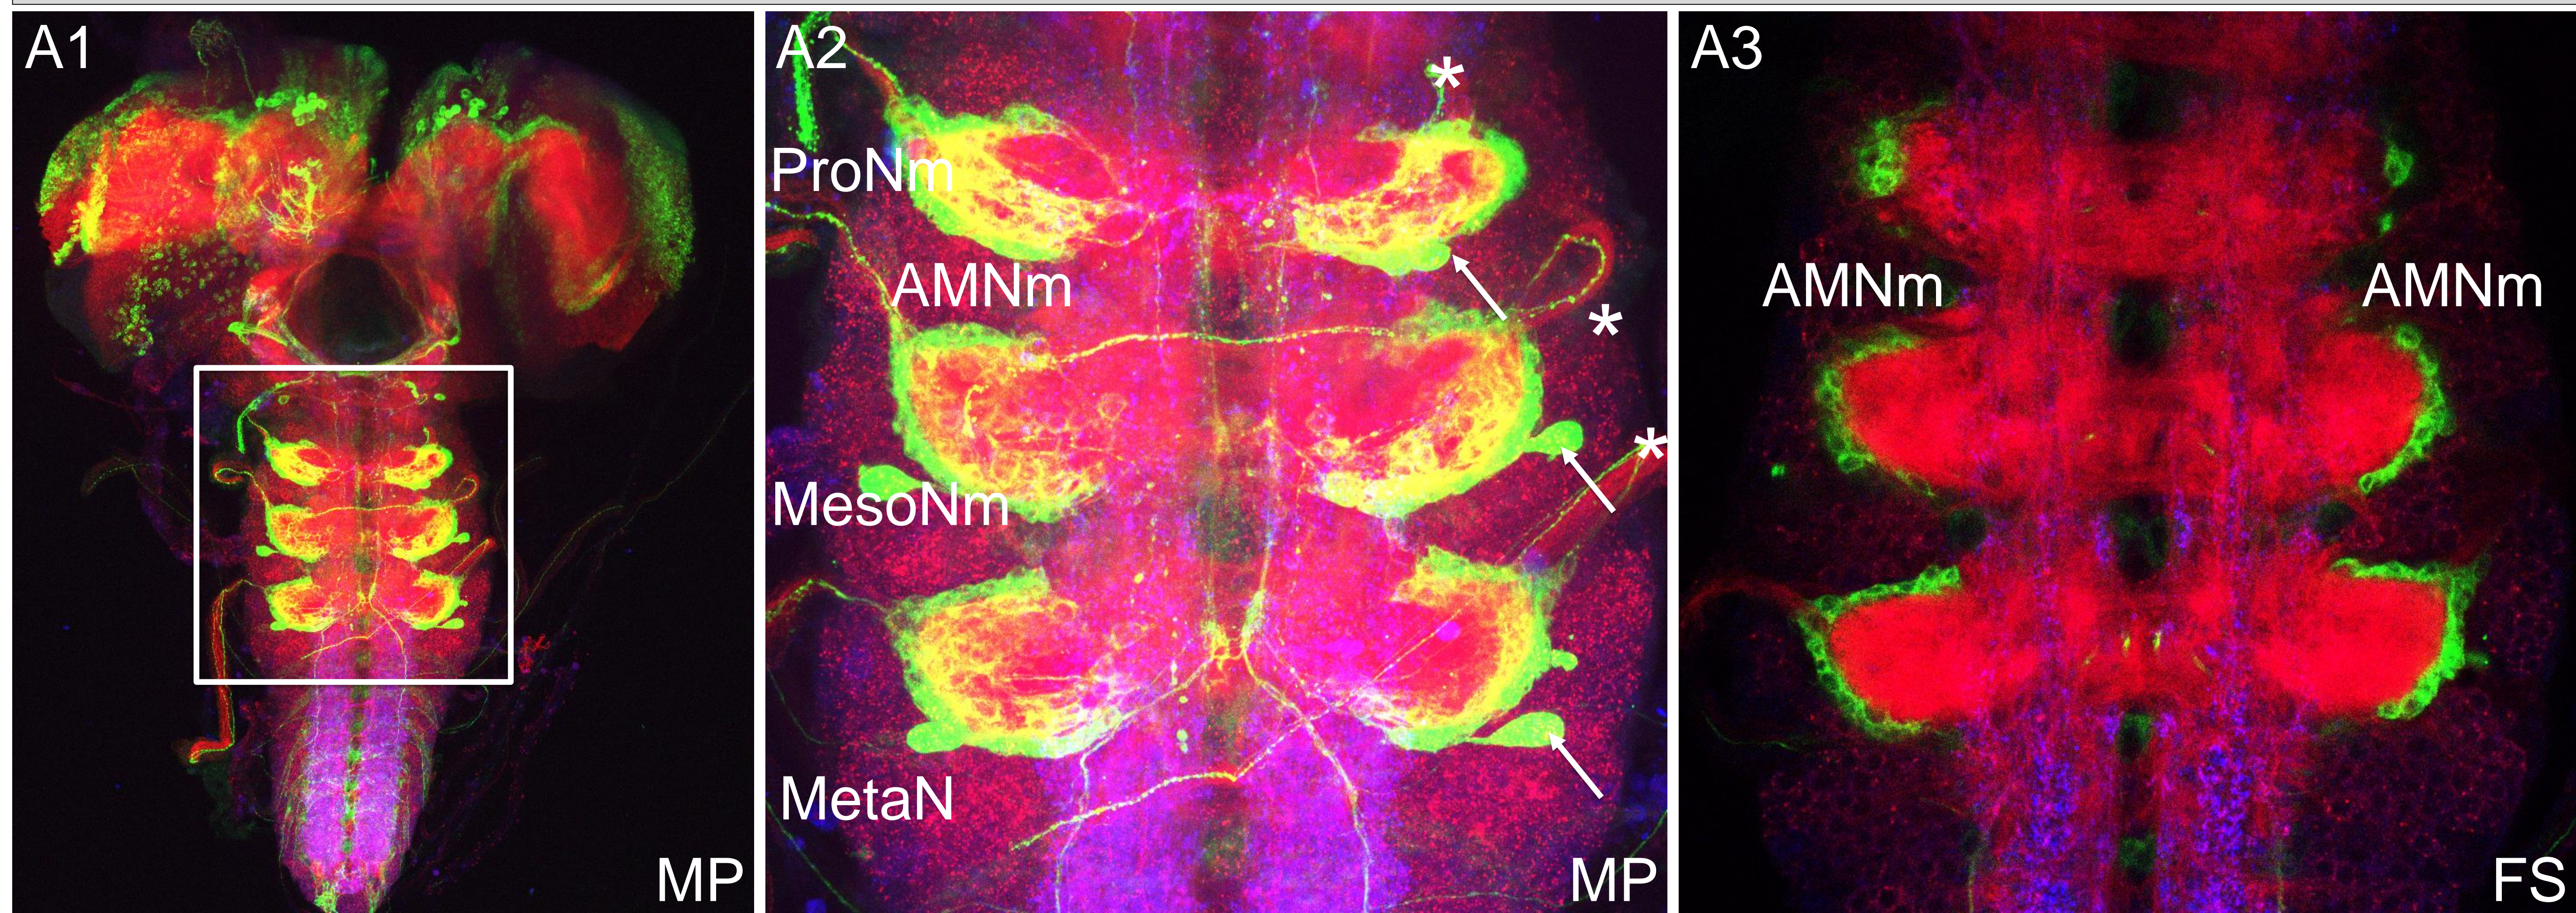

Fig S3

*repo>mCD8::GFP*: GFP DII BRP

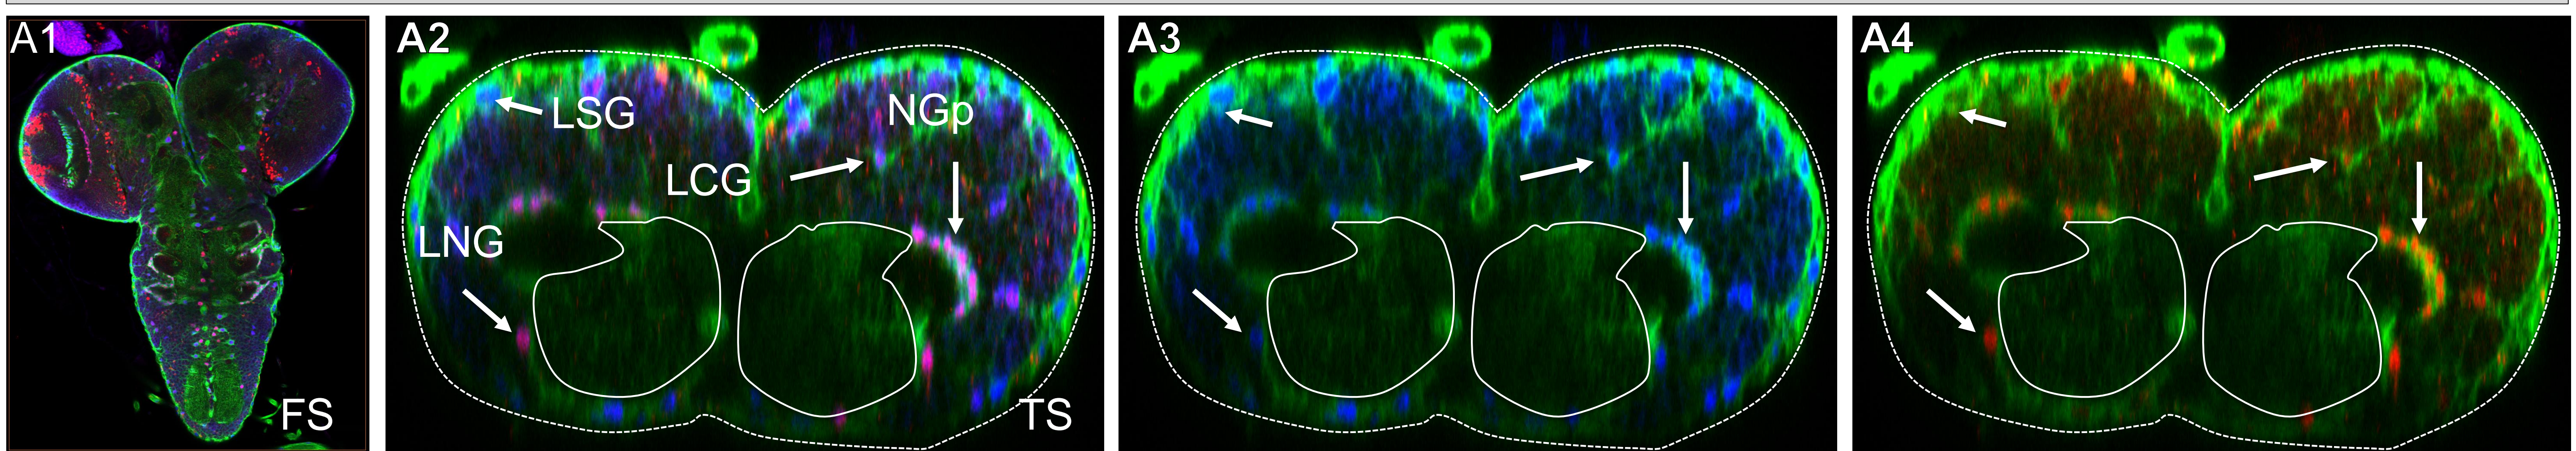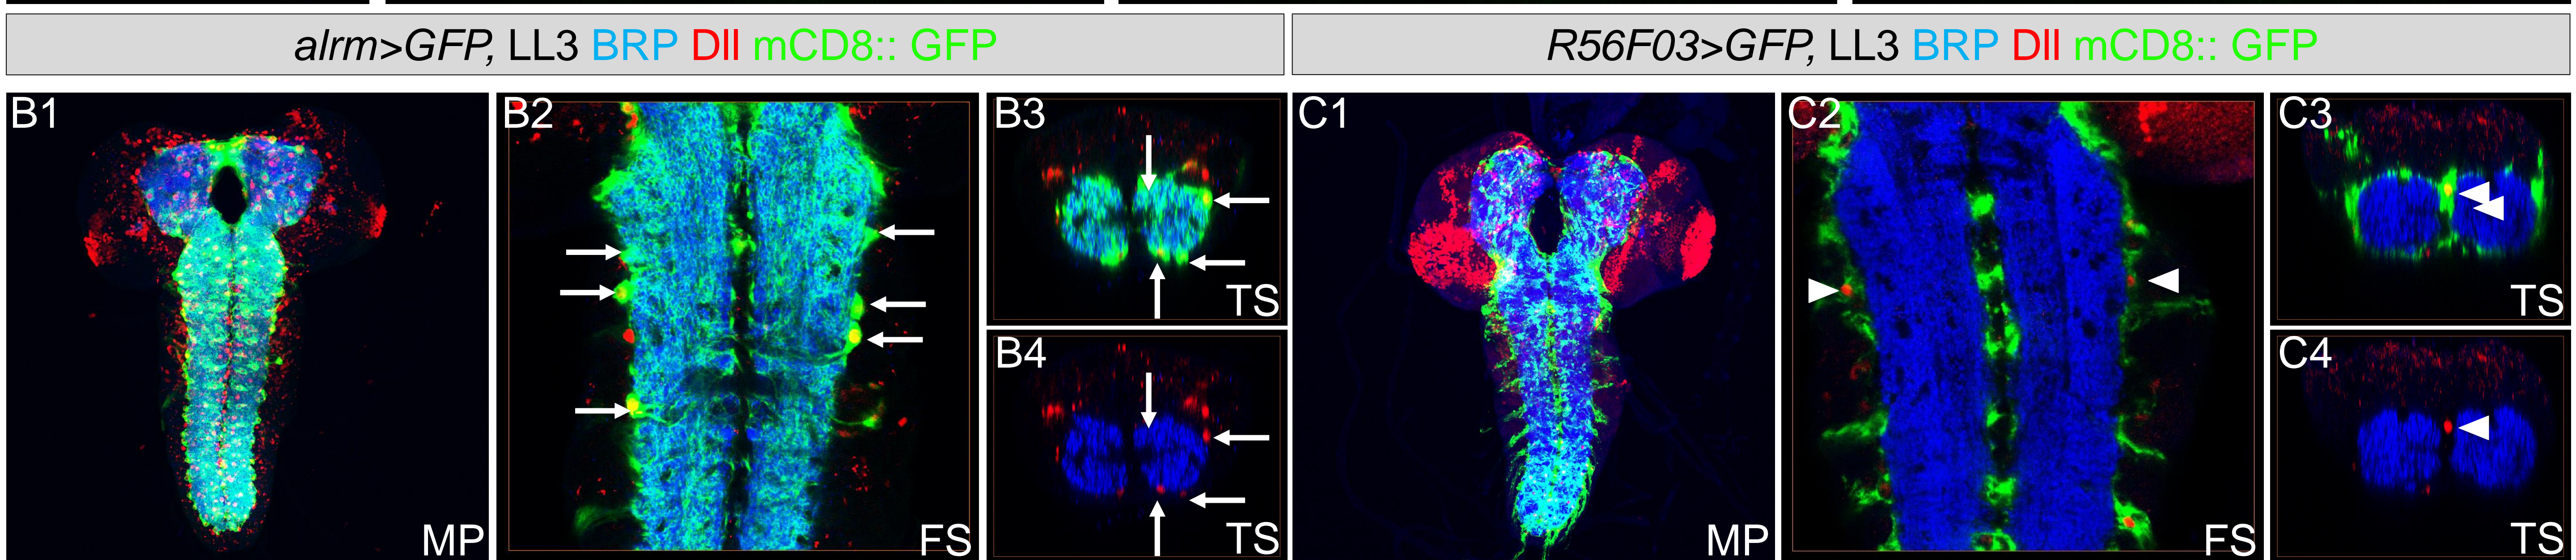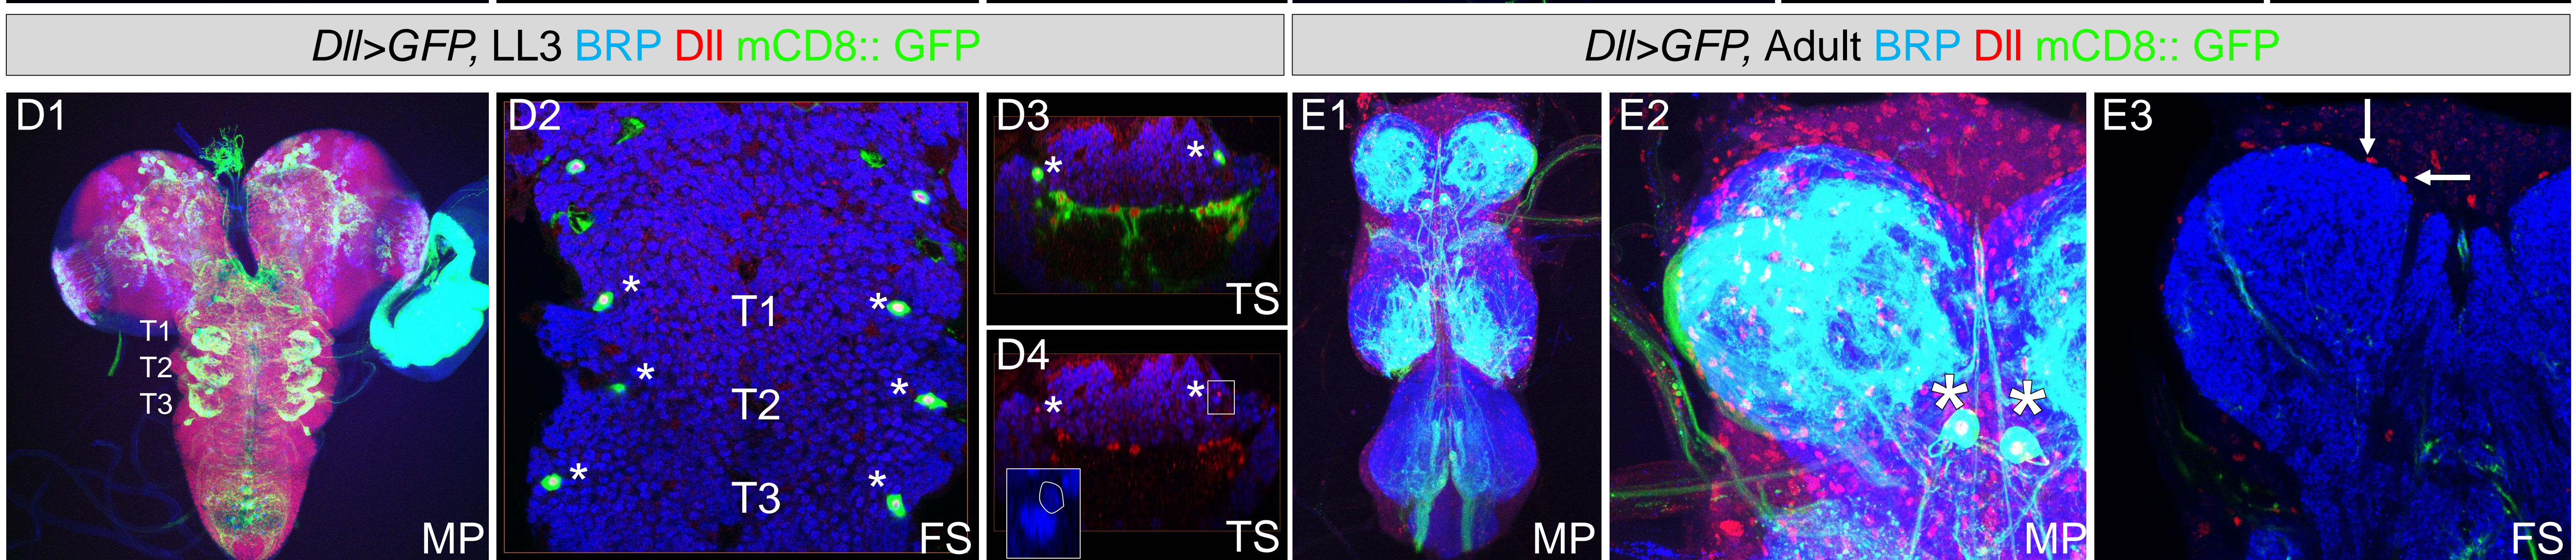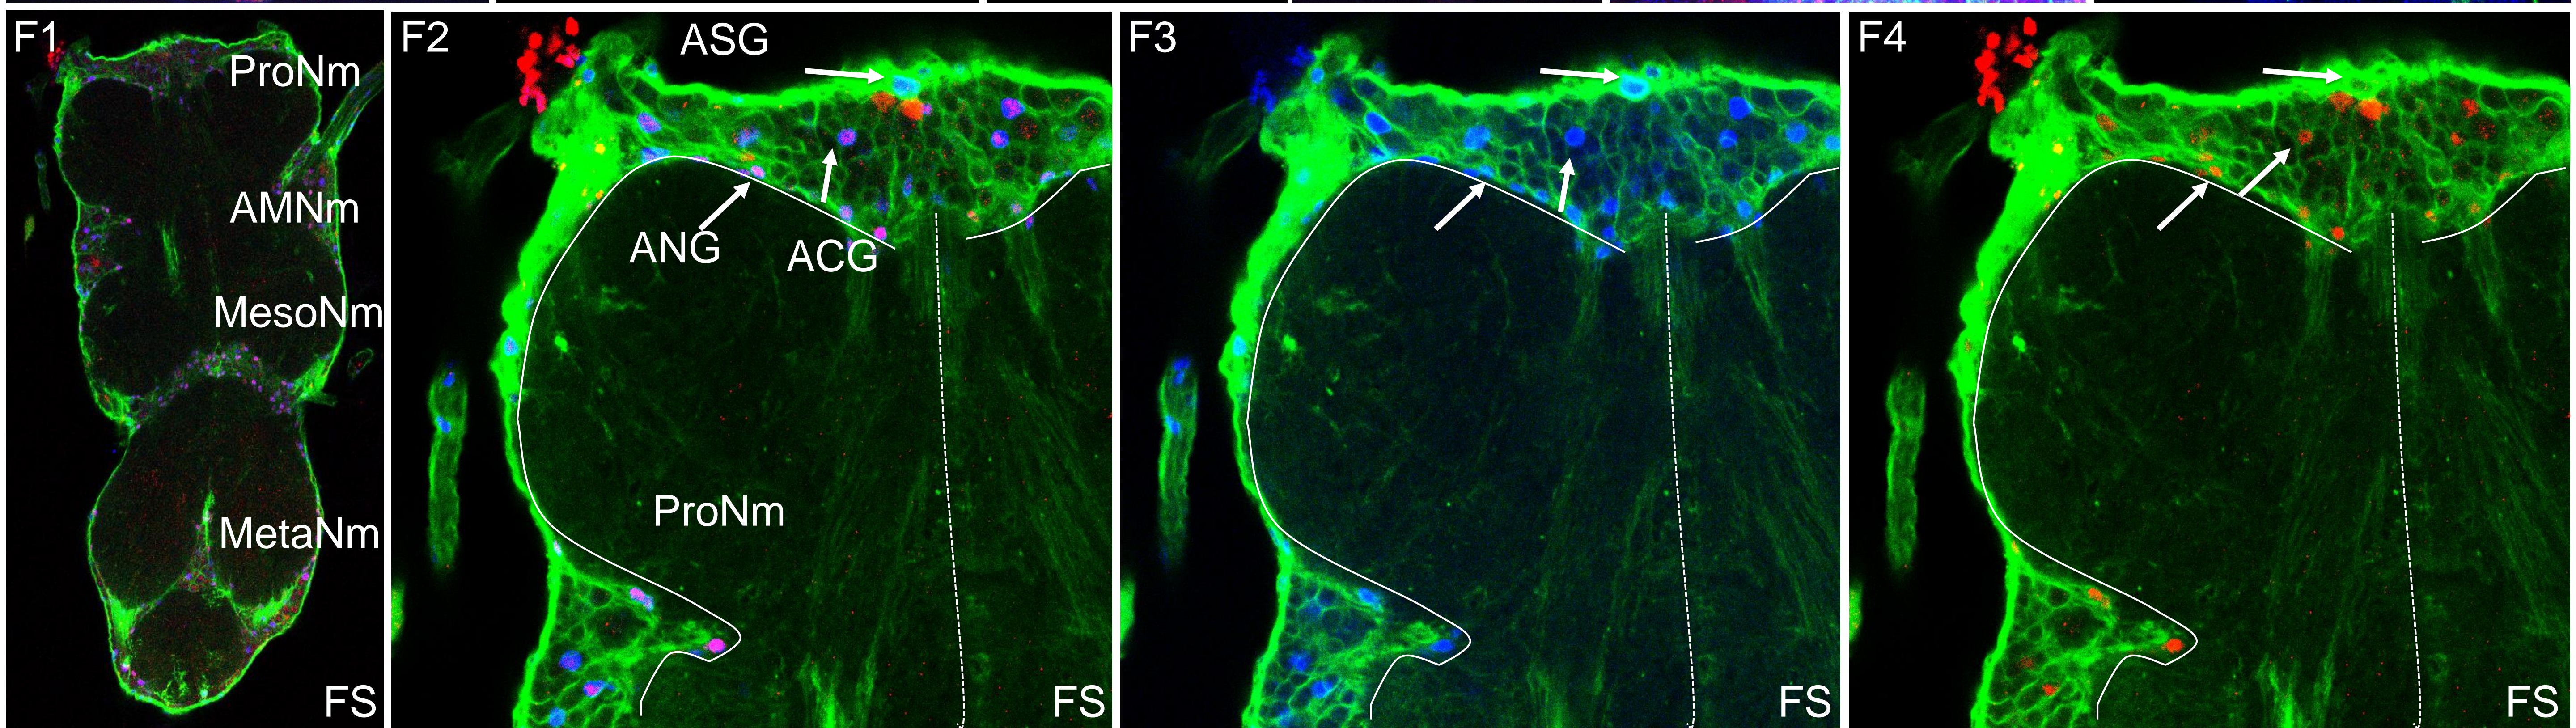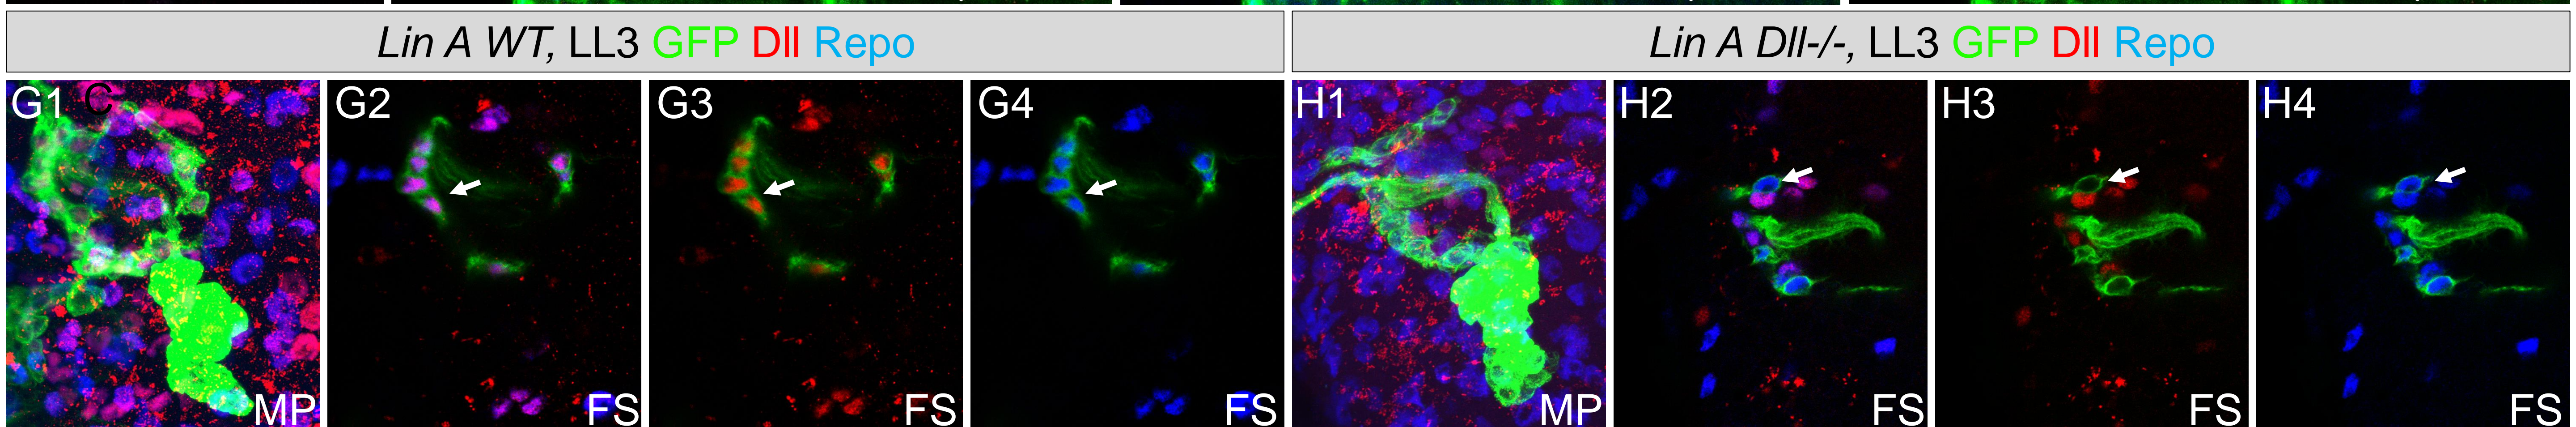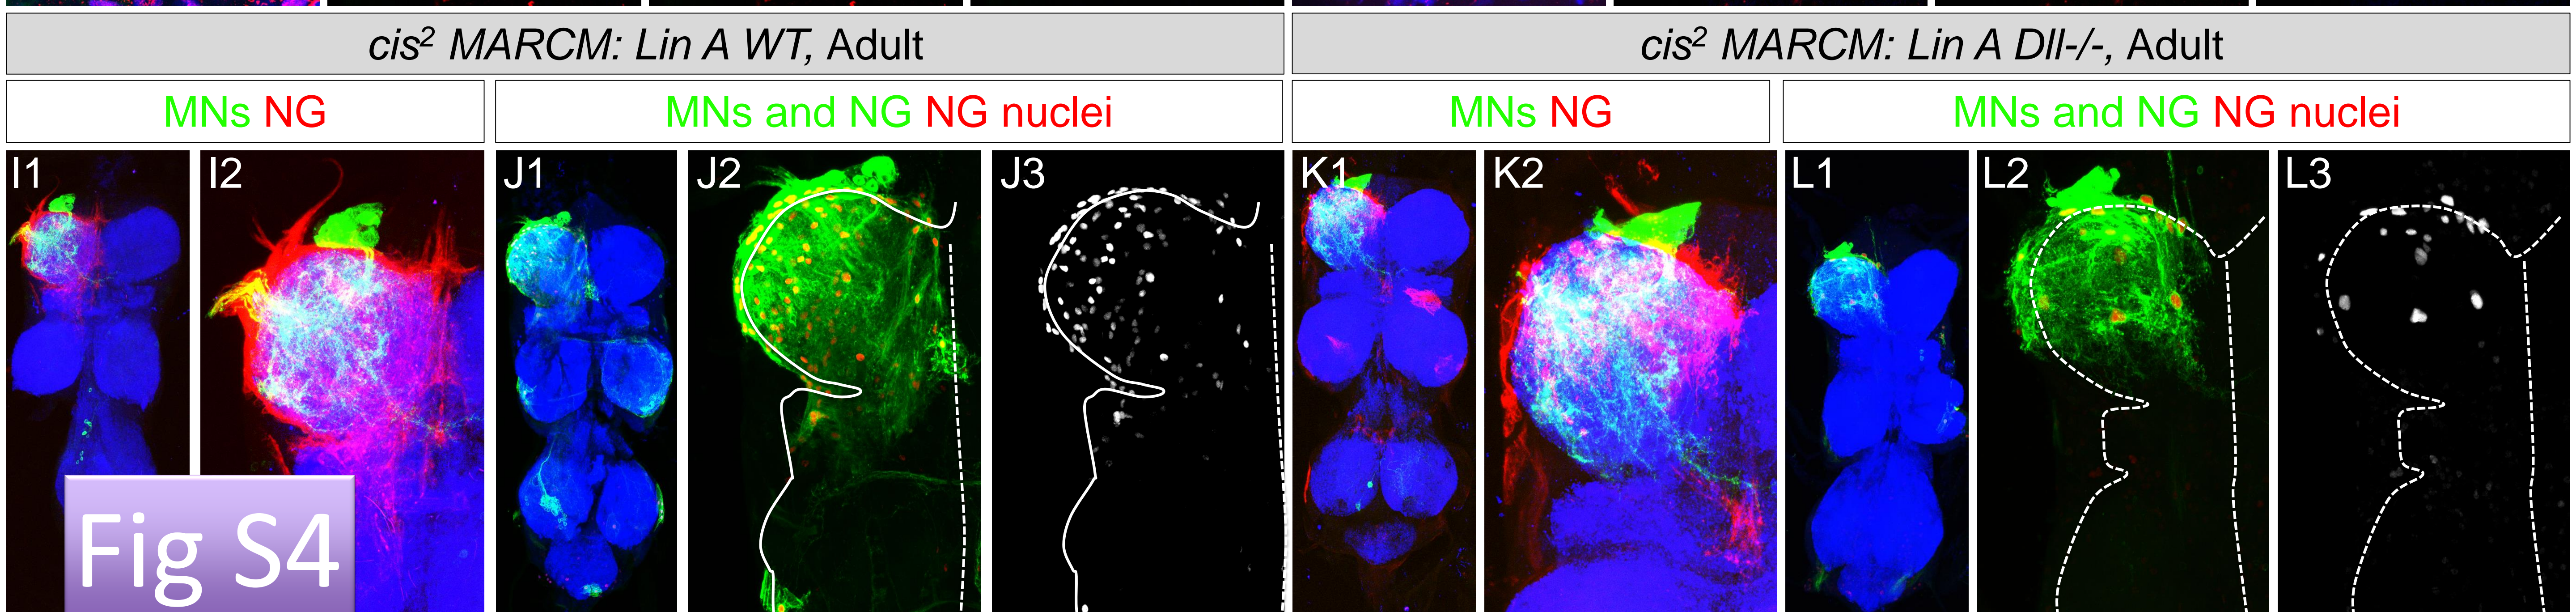

Fig S4

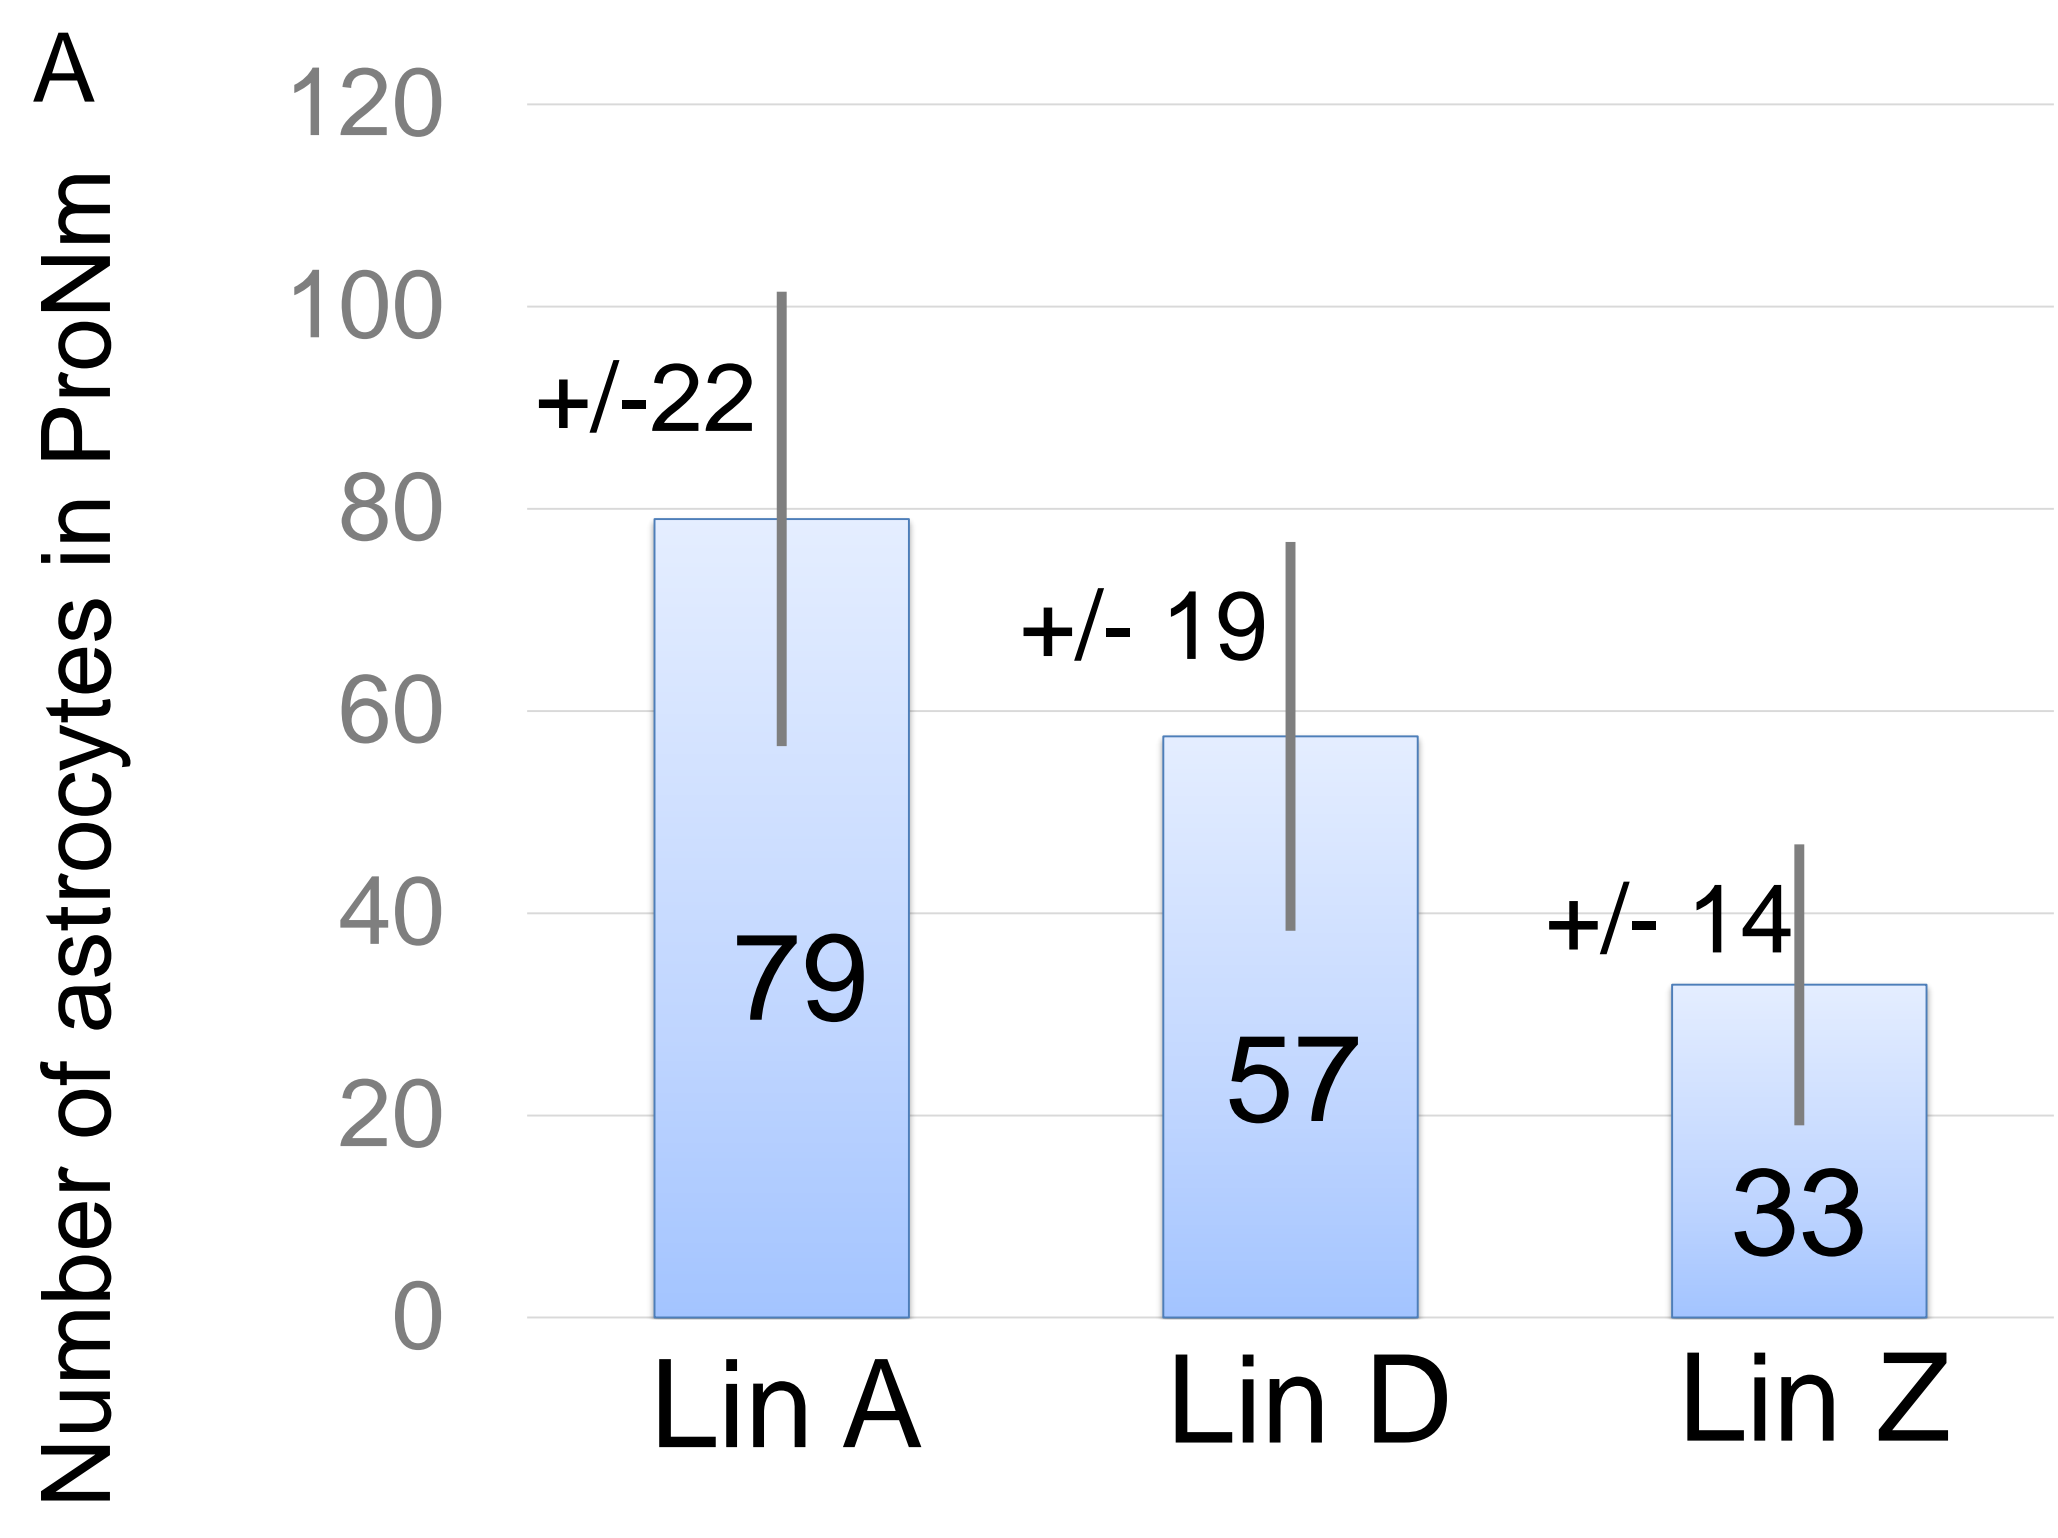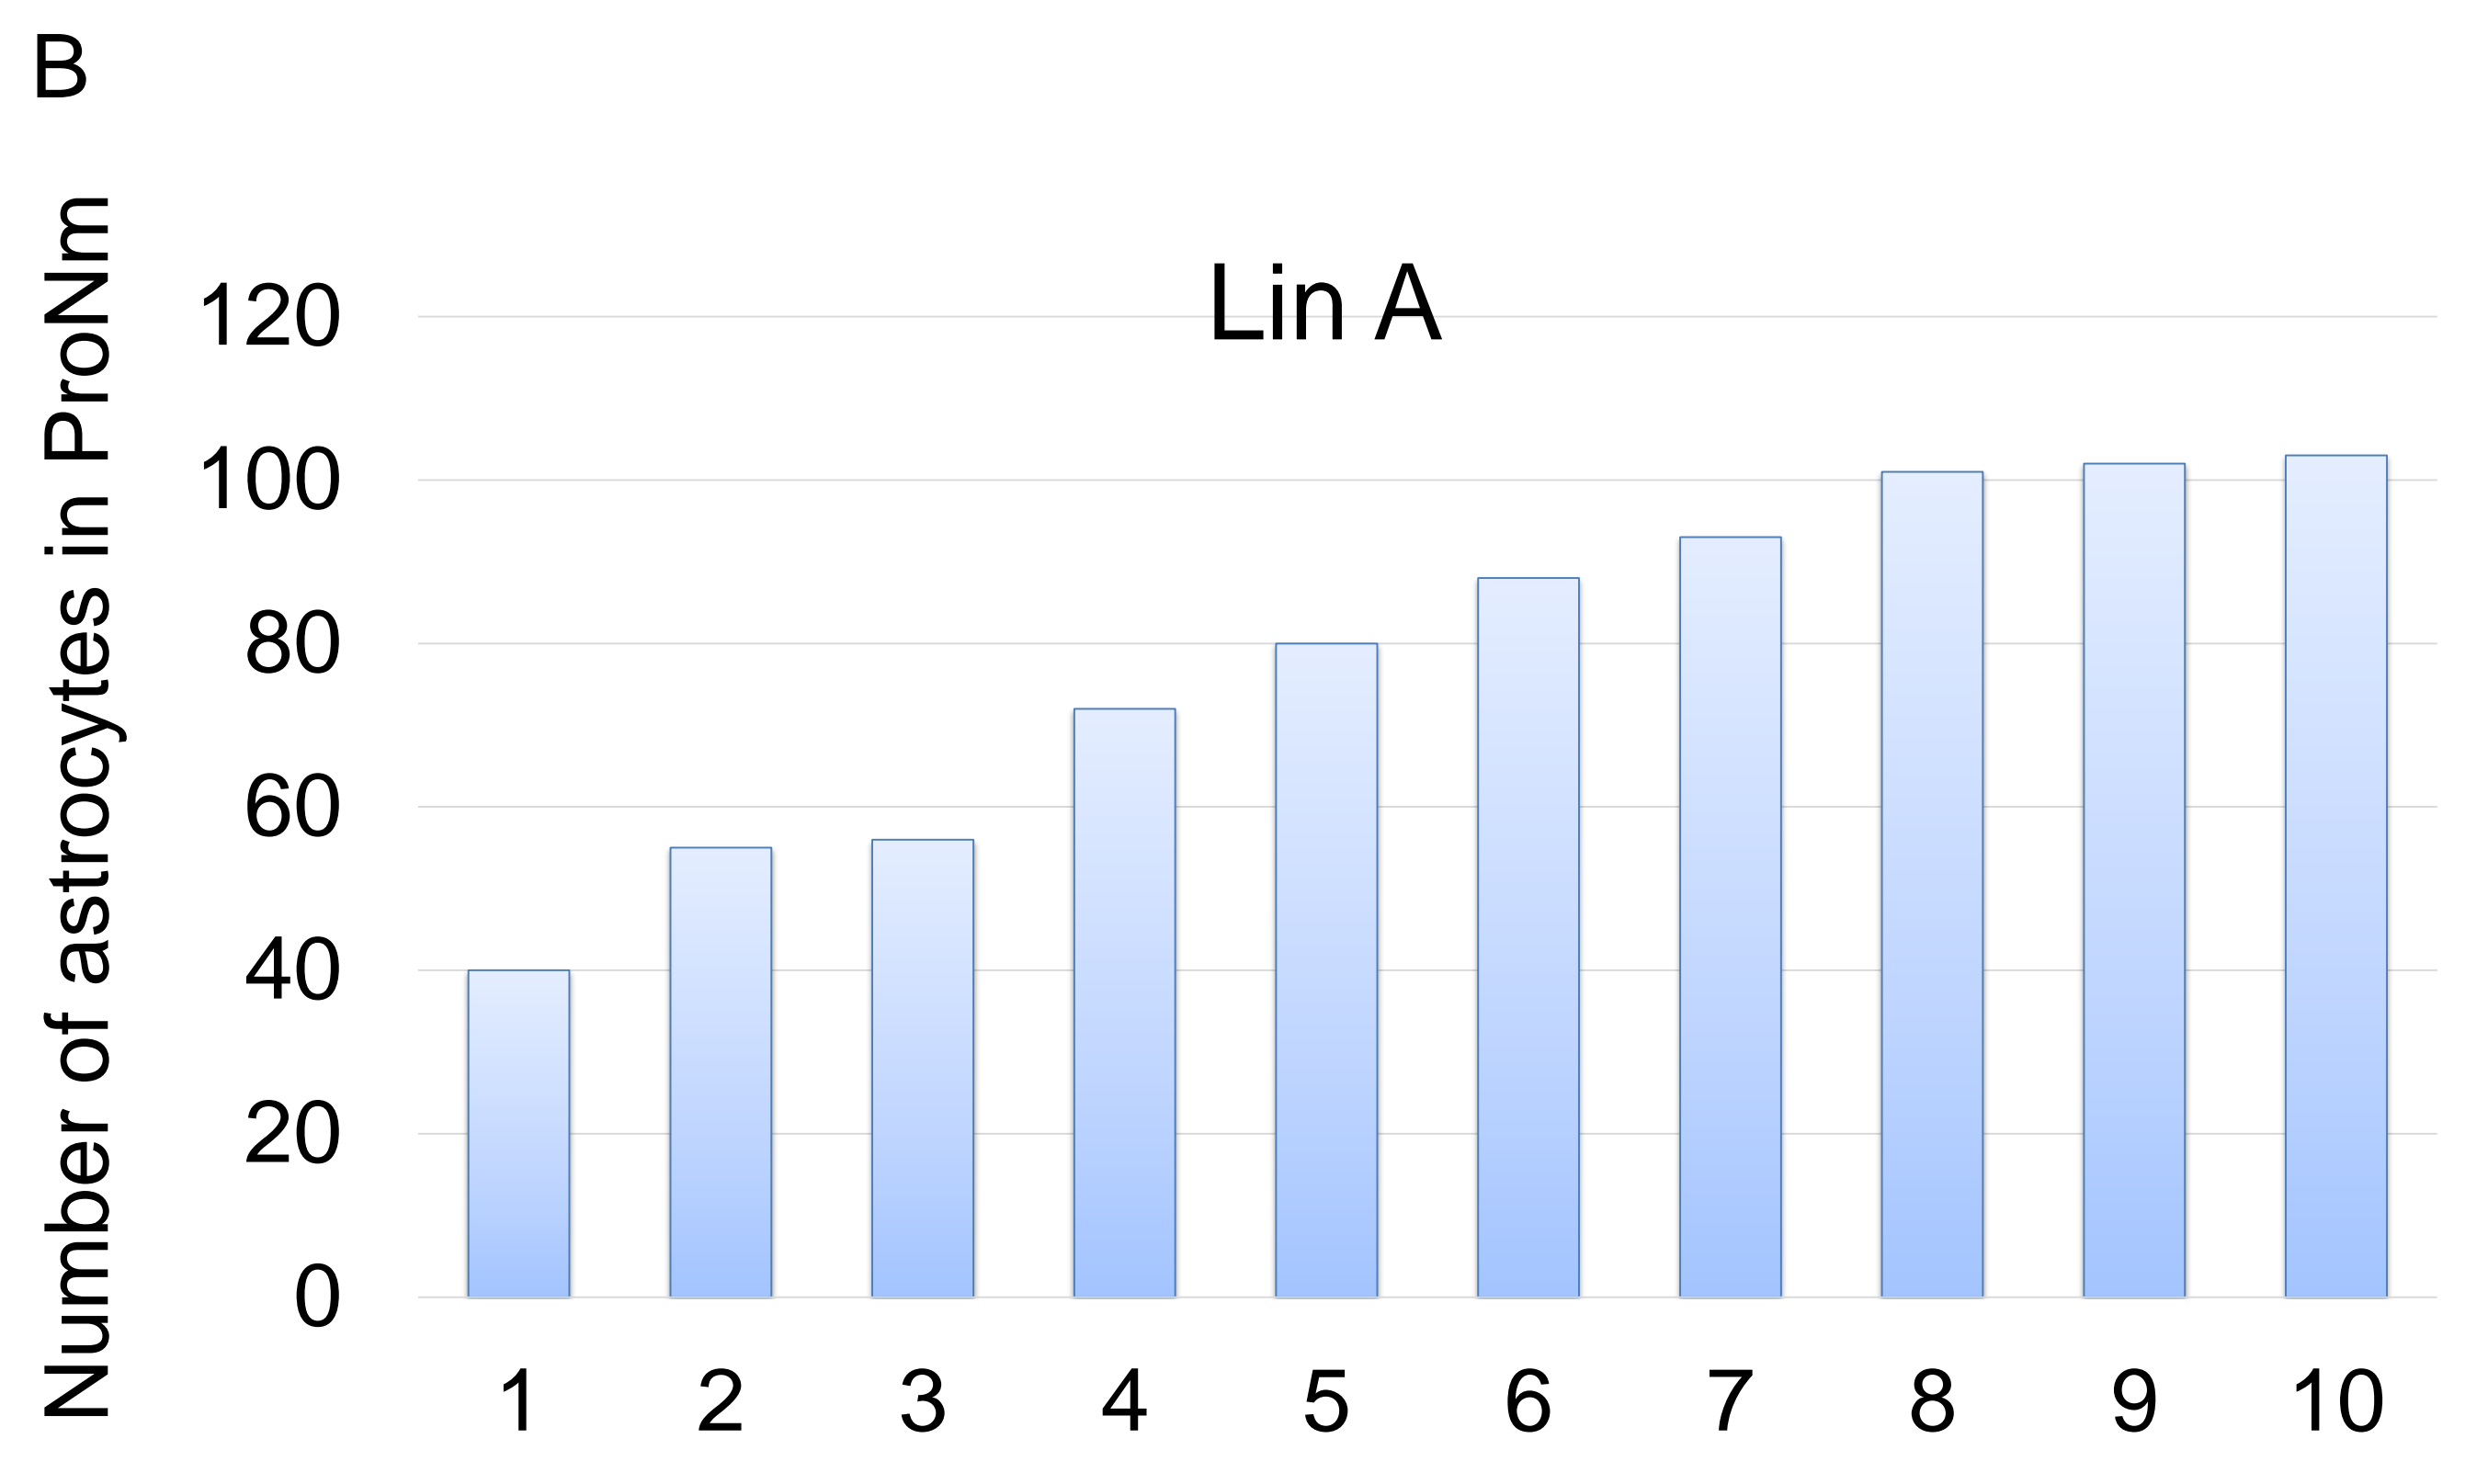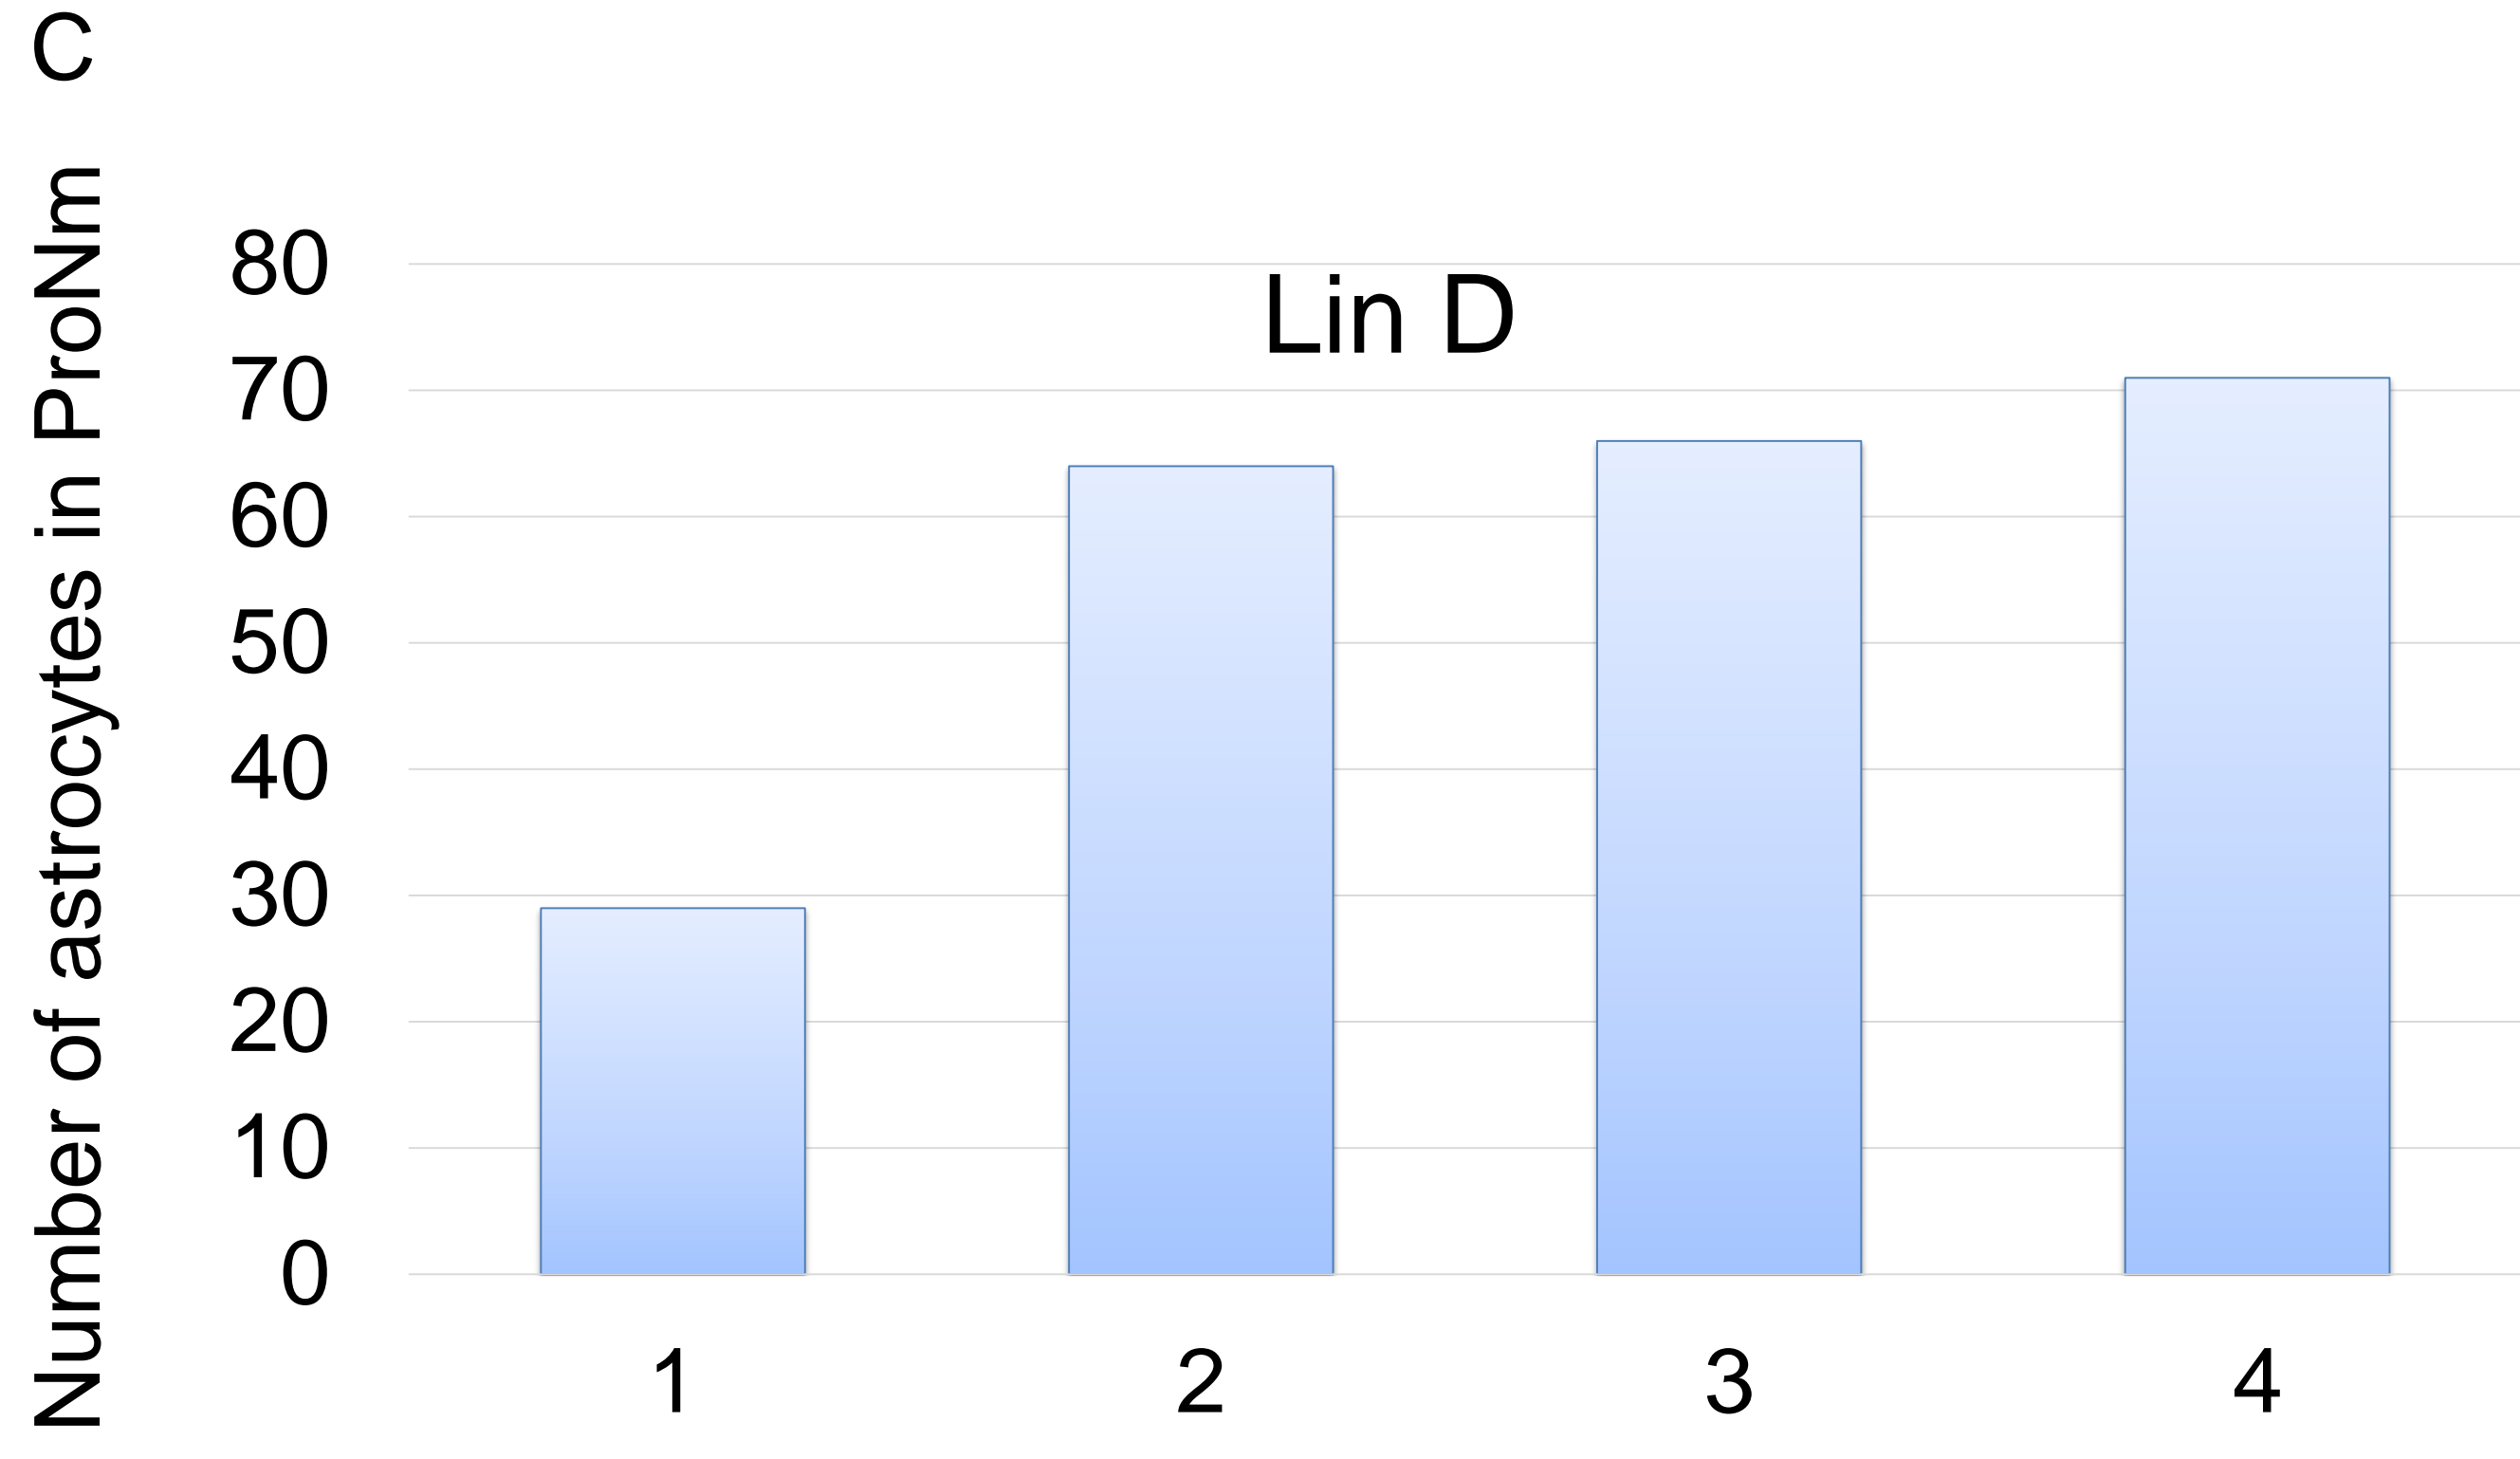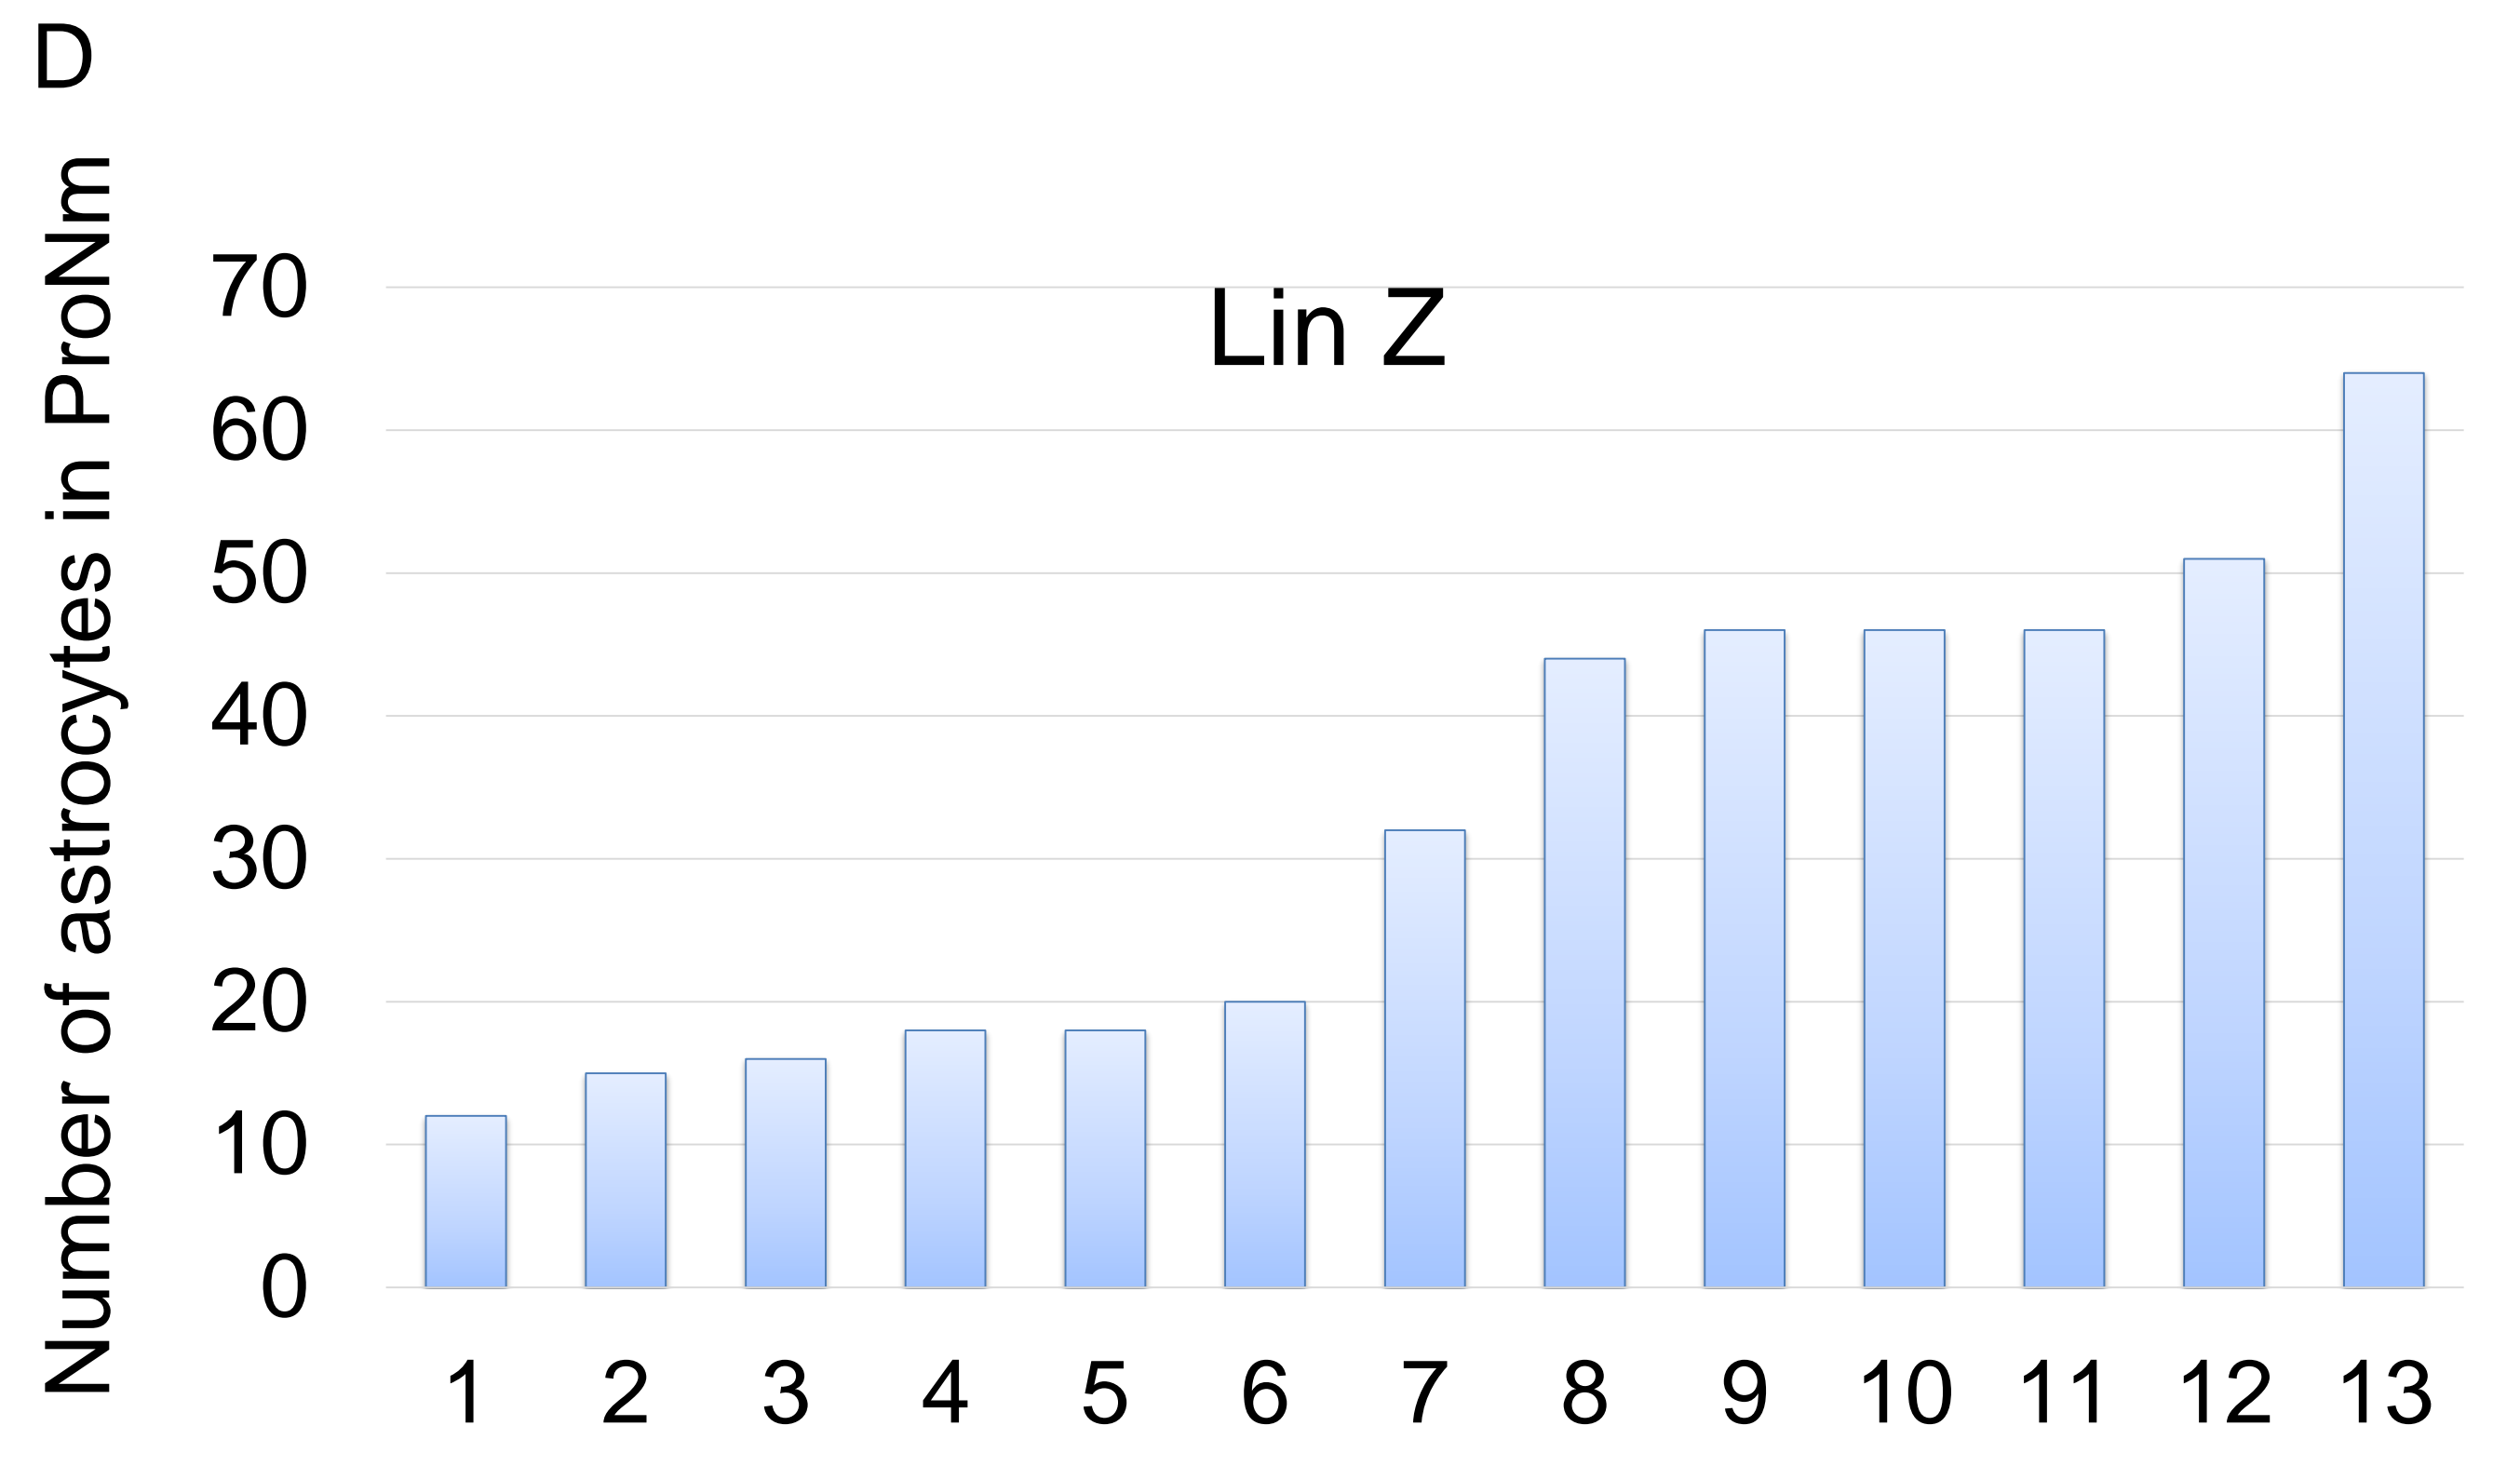

Fig S5

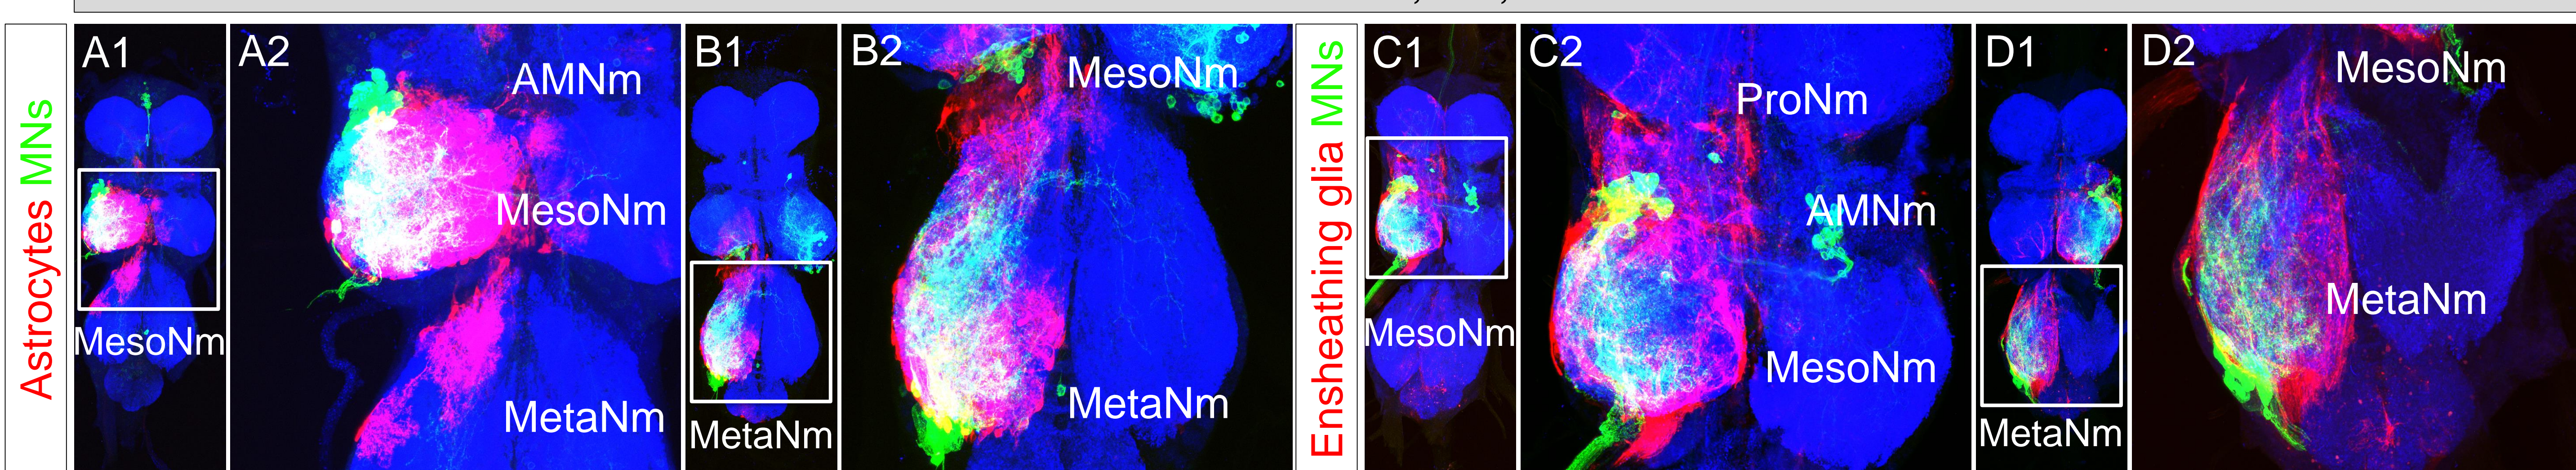

Fig S6
